# Supplementary material for: Consumers’ Awareness, Behavior and Expectations for Food Packaging Environmental Sustainability: Influence of Socio-Demographic Characteristics
Source: MDPI journal article supplement (doi:10.3390/foods11162388), 2022-08-09
Supplement: s1 [file s1]

# ITALIAN VERSION OF THE QUESTIONNAIRE

---

Ti ringraziamo per aver accettato di partecipare a questo studio condotto dall'Università di Scienze Gastronomiche di Pollenzo.

Il questionario richiede circa 10 minuti per essere completato.

Ti verrà chiesto di rispondere a domande sulle tue reazioni in merito al packaging alimentare dal punto di vista della sostenibilità. Non ci sono risposte corrette o errate per cui non preoccuparti, prenditi il tempo necessario e rispondi nella maniera più naturale e istintiva possibile.

La partecipazione è completamente volontaria e puoi ritirarti in qualsiasi momento senza dare motivazioni. Le tue risposte saranno memorizzate in modo anonimo e analizzate in modo aggregato.

Per maggiori informazioni contattare [m.molino@studenti.unisg.it](mailto:m.molino@studenti.unisg.it).

Ai sensi del Regolamento (UE) 2016/679 approvato dal Parlamento Europeo e dal Consiglio e ai sensi della legge italiana n. 101/18 del 10 agosto 2018 e sue modifiche pubblicate sulla Gazzetta Ufficiale n. 205 del 04 settembre 2018 (tutela delle persone e di altri soggetti rispetto al trattamento dei dati personali) il trattamento delle informazioni da Lei fornite si svolgerà nel rispetto dei principi di correttezza, liceità e tutela della Sua privacy e dei Suoi diritti.

Ho preso nota delle condizioni di cui sopra e continuando acconsento a partecipare in modo anonimo allo studio.

## Genere

- ☐ Maschio
- ☐ Femmina
- ☐ Altro
- ☐ Preferisco non dichiararlo

## Età

▼ 18 (18) ... 100 (100)

## Nazionalità

▼ Afghanistan (1) ... Zimbabwe (1357)

**Titolo di studio**

- ☐ Licenza elementare
  - ☐ Licenza media
  - ☐ Diploma
  - ☐ Laurea triennale
  - ☐ Laurea specialistica
  - ☐ Dottorato
  - ☐ Specializzazione/Master
-

**Indica il significato dei seguenti simboli**

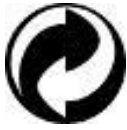

- ☐ Il materiale è realizzato con materiale riciclato
- ☐ Il materiale può essere riciclato
- ☐ Il produttore ha fornito un contributo finanziario al recupero o al riciclaggio dei materiali
- ☐ Il materiale è realizzato con materiali bio-based
- ☐ Il materiale è compostabile
- ☐ Non so cosa significhi il simbolo

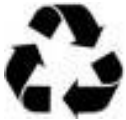

- ☐ Il materiale è realizzato con materiale riciclato
- ☐ Il materiale può essere riciclato
- ☐ Il produttore ha fornito un contributo finanziario al recupero o al riciclaggio dei materiali
- ☐ Il materiale è realizzato con materiali bio-based
- ☐ Il materiale è compostabile
- ☐ Non so cosa significhi il simbolo

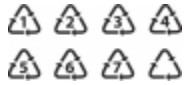

- ☐ Il livello di materiale riciclato utilizzato
- ☐ La regione di origine
- ☐ Il tipo di plastica
- ☐ Il livello di biodegradabilità
- ☐ Quanto il produttore ha contribuito al recupero o al riciclaggio dei materiali
- ☐ Non so cosa significhi il simbolo

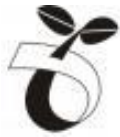

- ☐ Il materiale è realizzato con materiale riciclato
- ☐ Il materiale può essere riciclato
- ☐ Il produttore ha fornito un contributo finanziario al recupero o al riciclaggio dei materiali
- ☐ Il materiale è realizzato con materiali biobased
- ☐ Il materiale è compostabile
- ☐ Non so cosa significhi il simbolo

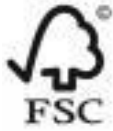

- ☐ Il materiale proviene dall'Unione Europea
- ☐ Il materiale ha un alto contenuto di materiale riciclato
- ☐ Il materiale è compostabile
- ☐ Il produttore ha fornito un contributo finanziario al recupero o al riciclaggio dei materiali
- ☐ Il materiale è realizzato con legno proveniente da fonti sostenibili
- ☐ Non so cosa significhi il simbolo

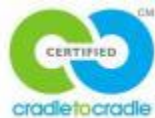

- ☐ Il produttore ha fornito un contributo finanziario al recupero o al riciclaggio dei materiali
- ☐ L'imballaggio è sicuro, prodotto con energia rinnovabile, basso utilizzo di acqua e il materiale è riutilizzabile o compostabile
- ☐ L'imballaggio può essere riciclato
- ☐ L'imballaggio è certificato per durare a lungo
- ☐ L'imballaggio è composto al 100% da materiale riciclato
- ☐ Non so cosa significhi il simbolo

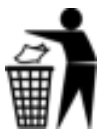

- ☐ Il materiale può essere compostato in casa
- ☐ Il materiale può essere riciclato
- ☐ Il materiale non può essere riciclato
- ☐ Non sporcare
- ☐ Il materiale è realizzato con materiale riciclato
- ☐ Non so cosa significhi il simbolo

**Sono a conoscenza del concetto "economia circolare"**

- ☐ Completamente in disaccordo
- ☐ In disaccordo
- ☐ Abbastanza in disaccordo
- ☐ Né in accordo né in disaccordo
- ☐ Abbastanza d'accordo
- ☐ D'accordo
- ☐ Completamente d'accordo

**Sono a conoscenza del concetto "spreco alimentare"**

- ☐ Completamente in disaccordo
- ☐ In disaccordo
- ☐ Abbastanza in disaccordo
- ☐ Né in accordo né in disaccordo
- ☐ Abbastanza d'accordo
- ☐ D'accordo
- ☐ Completamente d'accordo

**Penso che sia importante tenere in considerazione il materiale del packaging nel momento di acquisto**

- ☐ Completamente in disaccordo
- ☐ In disaccordo
- ☐ Abbastanza in disaccordo
- ☐ Né in accordo né in disaccordo
- ☐ Abbastanza d'accordo
- ☐ D'accordo
- ☐ Completamente d'accordo

**Penso che il packaging di un prodotto e lo spreco alimentare siano correlati**

- ☐ Completamente in disaccordo
- ☐ In disaccordo
- ☐ Abbastanza in disaccordo

- ☐ Né in accordo né in disaccordo
- ☐ Abbastanza d'accordo
- ☐ D'accordo
- ☐ Completamente d'accordo

**Penso che un packaging sostenibile da un punto di vista ambientale si contraddistingua**

|                                                | Completament<br>e in<br>disaccordo | In<br>disaccor<br>do  | Abbastanza<br>in<br>disaccordo | Né in<br>accordo<br>né in<br>disaccord<br>o | Abbastan<br>za<br>d'accordo | D'accordo             | Completament<br>e d'accordo |
|------------------------------------------------|------------------------------------|-----------------------|--------------------------------|---------------------------------------------|-----------------------------|-----------------------|-----------------------------|
| Utilizzo di nanotecnologie                     | <input type="radio"/>              | <input type="radio"/> | <input type="radio"/>          | <input type="radio"/>                       | <input type="radio"/>       | <input type="radio"/> | <input type="radio"/>       |
| Realizzato con materiali rigenerati            | <input type="radio"/>              | <input type="radio"/> | <input type="radio"/>          | <input type="radio"/>                       | <input type="radio"/>       | <input type="radio"/> | <input type="radio"/>       |
| Funzione intelligente/attiva                   | <input type="radio"/>              | <input type="radio"/> | <input type="radio"/>          | <input type="radio"/>                       | <input type="radio"/>       | <input type="radio"/> | <input type="radio"/>       |
| Riduzione del packaging stesso                 | <input type="radio"/>              | <input type="radio"/> | <input type="radio"/>          | <input type="radio"/>                       | <input type="radio"/>       | <input type="radio"/> | <input type="radio"/>       |
| Non produce scarti ed è riutilizzabile al 100% | <input type="radio"/>              | <input type="radio"/> | <input type="radio"/>          | <input type="radio"/>                       | <input type="radio"/>       | <input type="radio"/> | <input type="radio"/>       |
| <b>per</b>                                     |                                    |                       |                                |                                             |                             |                       |                             |



**Indica quanto sei d'accordo con le seguenti affermazioni**

|                                                                                      | Completamente<br>in disaccordo | In<br>disaccordo      | Abbastanza<br>in<br>disaccordo | Né in<br>accordo<br>né in<br>disaccordo | Abbastanza<br>d'accordo | D'accordo             | Completamente<br>d'accordo |
|--------------------------------------------------------------------------------------|--------------------------------|-----------------------|--------------------------------|-----------------------------------------|-------------------------|-----------------------|----------------------------|
| Acquisto prodotti sfusi                                                              | <input type="radio"/>          | <input type="radio"/> | <input type="radio"/>          | <input type="radio"/>                   | <input type="radio"/>   | <input type="radio"/> | <input type="radio"/>      |
| Cerco di acquistare prodotti che hanno meno packaging                                | <input type="radio"/>          | <input type="radio"/> | <input type="radio"/>          | <input type="radio"/>                   | <input type="radio"/>   | <input type="radio"/> | <input type="radio"/>      |
| Riutilizzo il packaging dei prodotti che acquisto                                    | <input type="radio"/>          | <input type="radio"/> | <input type="radio"/>          | <input type="radio"/>                   | <input type="radio"/>   | <input type="radio"/> | <input type="radio"/>      |
| Preferisco acquistare prodotti il cui packaging consenta una maggiore conservabilità | <input type="radio"/>          | <input type="radio"/> | <input type="radio"/>          | <input type="radio"/>                   | <input type="radio"/>   | <input type="radio"/> | <input type="radio"/>      |
| Leggo la descrizione del packaging                                                   | <input type="radio"/>          | <input type="radio"/> | <input type="radio"/>          | <input type="radio"/>                   | <input type="radio"/>   | <input type="radio"/> | <input type="radio"/>      |

**Indica quanto sei d'accordo con le seguenti affermazioni**

|                                                                                                                   | Completamente<br>in disaccordo | In<br>disaccordo      | Abbastanza<br>in<br>disaccordo | Né in<br>accordo né<br>in<br>disaccordo | Abbastanza<br>d'accordo | D'accordo             | Completamente<br>d'accordo |
|-------------------------------------------------------------------------------------------------------------------|--------------------------------|-----------------------|--------------------------------|-----------------------------------------|-------------------------|-----------------------|----------------------------|
| Riduco<br>l'acquisto di<br>alimenti in<br>confezioni<br>di plastica                                               | <input type="radio"/>          | <input type="radio"/> | <input type="radio"/>          | <input type="radio"/>                   | <input type="radio"/>   | <input type="radio"/> | <input type="radio"/>      |
| Faccio<br>attenzione<br>alla raccolta<br>differenziata                                                            | <input type="radio"/>          | <input type="radio"/> | <input type="radio"/>          | <input type="radio"/>                   | <input type="radio"/>   | <input type="radio"/> | <input type="radio"/>      |
| Solitamente<br>acquisto<br>prodotti di<br>aziende di<br>cui conosco<br>i valori di<br>sostenibilità<br>ambientale | <input type="radio"/>          | <input type="radio"/> | <input type="radio"/>          | <input type="radio"/>                   | <input type="radio"/>   | <input type="radio"/> | <input type="radio"/>      |
| Riduco gli<br>scarti<br>alimentari                                                                                | <input type="radio"/>          | <input type="radio"/> | <input type="radio"/>          | <input type="radio"/>                   | <input type="radio"/>   | <input type="radio"/> | <input type="radio"/>      |

**Per me è importante che sulla confezione sia riportata**

|                                                                          | Completamente<br>in disaccordo | In<br>disaccordo      | Abbastanza in<br>disaccordo | Né in<br>accordo né in<br>disaccordo | Abbastanza<br>d'accordo | D'accordo             | Completamente<br>d'accordo |
|--------------------------------------------------------------------------|--------------------------------|-----------------------|-----------------------------|--------------------------------------|-------------------------|-----------------------|----------------------------|
| Indicazione<br>del materiale<br>del packaging                            | <input type="radio"/>          | <input type="radio"/> | <input type="radio"/>       | <input type="radio"/>                | <input type="radio"/>   | <input type="radio"/> | <input type="radio"/>      |
| Indicazione<br>sulla tipologia<br>di raccolta del<br>packaging           | <input type="radio"/>          | <input type="radio"/> | <input type="radio"/>       | <input type="radio"/>                | <input type="radio"/>   | <input type="radio"/> | <input type="radio"/>      |
| Simboli relativi<br>alla<br>sostenibilità<br>ambientale del<br>packaging | <input type="radio"/>          | <input type="radio"/> | <input type="radio"/>       | <input type="radio"/>                | <input type="radio"/>   | <input type="radio"/> | <input type="radio"/>      |
| Elementi<br>narrativi che<br>raccontano la<br>tipologia di<br>packaging  | <input type="radio"/>          | <input type="radio"/> | <input type="radio"/>       | <input type="radio"/>                | <input type="radio"/>   | <input type="radio"/> | <input type="radio"/>      |
| Impronta<br>ecologica del<br>packaging                                   | <input type="radio"/>          | <input type="radio"/> | <input type="radio"/>       | <input type="radio"/>                | <input type="radio"/>   | <input type="radio"/> | <input type="radio"/>      |
| Paese di<br>origine del<br>prodotto<br>alimentare                        | <input type="radio"/>          | <input type="radio"/> | <input type="radio"/>       | <input type="radio"/>                | <input type="radio"/>   | <input type="radio"/> | <input type="radio"/>      |
| Valori<br>nutrizionali del<br>prodotto<br>alimentare                     | <input type="radio"/>          | <input type="radio"/> | <input type="radio"/>       | <input type="radio"/>                | <input type="radio"/>   | <input type="radio"/> | <input type="radio"/>      |
| Data di<br>scadenza del<br>prodotto<br>alimentare                        | <input type="radio"/>          | <input type="radio"/> | <input type="radio"/>       | <input type="radio"/>                | <input type="radio"/>   | <input type="radio"/> | <input type="radio"/>      |

**Penso che le aziende potrebbero aumentare la comunicazione della sostenibilità ambientale del packaging in etichetta tramite**

|                                                                      | Completamente<br>in disaccordo | In<br>disaccordo      | Abbastanza<br>in disaccordo | Né in accordo<br>né in<br>disaccordo | Abbastanza<br>d'accordo | D'accordo             | Completamente<br>d'accordo |
|----------------------------------------------------------------------|--------------------------------|-----------------------|-----------------------------|--------------------------------------|-------------------------|-----------------------|----------------------------|
| Simboli più chiari<br>e più grandi                                   | <input type="radio"/>          | <input type="radio"/> | <input type="radio"/>       | <input type="radio"/>                | <input type="radio"/>   | <input type="radio"/> | <input type="radio"/>      |
| Descrizione dei<br>simboli                                           | <input type="radio"/>          | <input type="radio"/> | <input type="radio"/>       | <input type="radio"/>                | <input type="radio"/>   | <input type="radio"/> | <input type="radio"/>      |
| Frase sull'impatto<br>ambientale                                     | <input type="radio"/>          | <input type="radio"/> | <input type="radio"/>       | <input type="radio"/>                | <input type="radio"/>   | <input type="radio"/> | <input type="radio"/>      |
| Maggiori dettagli<br>sui materiali che<br>compongono il<br>packaging | <input type="radio"/>          | <input type="radio"/> | <input type="radio"/>       | <input type="radio"/>                | <input type="radio"/>   | <input type="radio"/> | <input type="radio"/>      |
| Maggiori dettagli<br>sulle modalità di<br>riciclo                    | <input type="radio"/>          | <input type="radio"/> | <input type="radio"/>       | <input type="radio"/>                | <input type="radio"/>   | <input type="radio"/> | <input type="radio"/>      |
| QR Code o<br>strumenti digitali                                      | <input type="radio"/>          | <input type="radio"/> | <input type="radio"/>       | <input type="radio"/>                | <input type="radio"/>   | <input type="radio"/> | <input type="radio"/>      |

**Grazie per aver completato il sondaggio.**

**La risposta è stata registrata.**

# ENGLISH VERSION OF THE QUESTIONNAIRE

---

Thank you for agreeing to participate in this study conducted by the University of Gastronomic Sciences in Pollenzo. The questionnaire requires about 10 minutes to complete. You will be asked to answer questions about your opinions about food packaging from a sustainability perspective. There are no right or wrong answers so do not worry, take your time and answer as naturally and instinctively as possible. Participation is completely voluntary and you can withdraw at any time without giving reasons. Your answers will be recorded anonymously and analyzed in aggregate. For more information contact [m.molino@studenti.unisg.it](mailto:m.molino@studenti.unisg.it). According to Regulation (EU) 2016/679 approved by the European Parliament and the Council and pursuant to Italian Law No. 101/18 of August 10, 2018 and its amendments published in the Official Gazette No. 205 of September 04, 2018 (protection of the people and other subjects with regard to the processing of personal data), the processing of the information you provide will be carried out in accordance with the principles of fairness, lawfulness and protection of your privacy and your rights. I have taken note of the above conditions and by continuing I agree to participate anonymously in the study.

## Gender

- ☐ Male
- ☐ Female
- ☐ Other gender
- ☐ Preferred not to report

## Age

▼ 18 (18) ... 100 (100)

## Nationality

▼ Afghanistan (1) ... Zimbabwe (1357)

**Education level**

- ☐ Primary school license
- ☐ Lower secondary school license
- ☐ Upper secondary school diploma
- ☐ Bachelor's degree
- ☐ Master's degree
- ☐ Doctoral degree
- ☐ Post degree

---

**Indicate the meaning of the symbols shown below**



- ☐ The material is made from recycled material
- ☐ The material can be recycled
- ☐ The manufacturer has made a financial contribution to recovery or recycling of materials
- ☐ The material is made from biobased materials
- ☐ The material is compostable
- ☐ I don't know what the symbol means

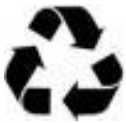

- ☐ The material is made from recycled material
- ☐ The material can be recycled
- ☐ The manufacturer has made a financial contribution to recovery or recycling of materials
- ☐ The material is made from biobased materials
- ☐ The material is compostable
- ☐ I don't know what the symbol means

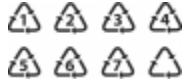

- ☐ The degree of recycled material used
- ☐ The region of origin
- ☐ The type of plastic
- ☐ The level of biodegradability
- ☐ How much the manufacturer has contributed to the recovery or recycling of materials
- ☐ I don't know what the symbols means



- ☐ The material is made from recycled material
- ☐ The material can be recycled
- ☐ The manufacturer has made a financial contribution to recovery or recycling of materials
- ☐ The material is made from biobased materials
- ☐ The material is compostable
- ☐ I don't know what the symbol means





- ☐ The material is sourced within the European Union
- ☐ The material has a high content of recycled material
- ☐ The material is compostable
- ☐ The manufacturer has made a financial contribution to recovery or recycling of materials
- ☐ The material is made from sustainably sourced wood
- ☐ I don't know what the symbols means

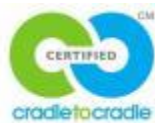

- ☐ The manufacturer has made a financial contribution to recovery or recycling of materials
- ☐ The packaging is safe, manufactured with renewable energy, low use of water and the material is fill reusable or compostable
- ☐ The packaging can be recycled
- ☐ The packaging is certified to last for a long time
- ☐ The packaging is made from 100% recycled material
- ☐ I don't know what the symbols means

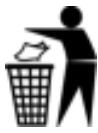

- ☐ The material can be home composted
- ☐ The material can be recycled
- ☐ The material can not be recycled
- ☐ Don't litter
- ☐ The material is made from recycled material
- ☐ I don't know what the symbol means

**I am aware of the concept of “circular economy”**

- ☐ Extremely disagree
- ☐ Disagree
- ☐ Somewhat disagree
- ☐ Neither agree or disagree
- ☐ Somewhat agree
- ☐ Agree
- ☐ Extremely agree

**I am aware of the concept of “food waste”**

- ☐ Extremely disagree
- ☐ Disagree
- ☐ Somewhat disagree
- ☐ Neither agree or disagree
- ☐ Somewhat agree
- ☐ Agree
- ☐ Extremely agree

**I think that it is important to consider packaging material when purchasing**

- ☐ Extremely disagree
- ☐ Disagree
- ☐ Somewhat disagree
- ☐ Neither agree or disagree
- ☐ Somewhat agree
- ☐ Agree
- ☐ Extremely agree

**I think that the food product packaging and food waste are related**

- ☐ Extremely disagree
- ☐ Disagree
- ☐ Somewhat disagree

☐ Neither agree or disagree

☐ Somewhat agree

☐ Agree

☐ Extremely agree

**I think that environmental sustainable packaging is distinguished by**

|                                        | Extremely disagree    | Disagree              | Somewhat disagree     | Neither agree or disagree | Somewhat agree        | Agree                 | Extremely agree       |
|----------------------------------------|-----------------------|-----------------------|-----------------------|---------------------------|-----------------------|-----------------------|-----------------------|
| Use of nanotechnologies                | <input type="radio"/> | <input type="radio"/> | <input type="radio"/> | <input type="radio"/>     | <input type="radio"/> | <input type="radio"/> | <input type="radio"/> |
| Made by regenerated materials          | <input type="radio"/> | <input type="radio"/> | <input type="radio"/> | <input type="radio"/>     | <input type="radio"/> | <input type="radio"/> | <input type="radio"/> |
| Smart/active function                  | <input type="radio"/> | <input type="radio"/> | <input type="radio"/> | <input type="radio"/>     | <input type="radio"/> | <input type="radio"/> | <input type="radio"/> |
| Packaging reduction                    | <input type="radio"/> | <input type="radio"/> | <input type="radio"/> | <input type="radio"/>     | <input type="radio"/> | <input type="radio"/> | <input type="radio"/> |
| Produces no waste and is 100% reusable | <input type="radio"/> | <input type="radio"/> | <input type="radio"/> | <input type="radio"/>     | <input type="radio"/> | <input type="radio"/> | <input type="radio"/> |

**Indicate your level of agreement with the following statements**

|                                                                     | Extremely<br>disagree | Disagree              | Somewhat<br>disagree  | Neither agree<br>or disagree | Somewhat<br>agree     | Agree                 | Extremely<br>agree    |
|---------------------------------------------------------------------|-----------------------|-----------------------|-----------------------|------------------------------|-----------------------|-----------------------|-----------------------|
| I buy products in bulk                                              | <input type="radio"/> | <input type="radio"/> | <input type="radio"/> | <input type="radio"/>        | <input type="radio"/> | <input type="radio"/> | <input type="radio"/> |
| I try to buy products that have less packaging                      | <input type="radio"/> | <input type="radio"/> | <input type="radio"/> | <input type="radio"/>        | <input type="radio"/> | <input type="radio"/> | <input type="radio"/> |
| I reuse the packaging of the products I buy                         | <input type="radio"/> | <input type="radio"/> | <input type="radio"/> | <input type="radio"/>        | <input type="radio"/> | <input type="radio"/> | <input type="radio"/> |
| I prefer to buy products whose packaging allows a longer shelf life | <input type="radio"/> | <input type="radio"/> | <input type="radio"/> | <input type="radio"/>        | <input type="radio"/> | <input type="radio"/> | <input type="radio"/> |
| I read the description of the packaging                             | <input type="radio"/> | <input type="radio"/> | <input type="radio"/> | <input type="radio"/>        | <input type="radio"/> | <input type="radio"/> | <input type="radio"/> |

**Indicate your level of agreement with the following statements**

|                                                                                        | Extremely<br>disagree | Disagree              | Somewhat<br>disagree  | Neither<br>agree or<br>disagree | Somewhat<br>agree     | Agree                 | Extremely<br>agree    |
|----------------------------------------------------------------------------------------|-----------------------|-----------------------|-----------------------|---------------------------------|-----------------------|-----------------------|-----------------------|
| I reduce the purchase of food in plastic packaging                                     | <input type="radio"/> | <input type="radio"/> | <input type="radio"/> | <input type="radio"/>           | <input type="radio"/> | <input type="radio"/> | <input type="radio"/> |
| I pay attention to separate waste collection                                           | <input type="radio"/> | <input type="radio"/> | <input type="radio"/> | <input type="radio"/>           | <input type="radio"/> | <input type="radio"/> | <input type="radio"/> |
| I usually buy products from companies whose environmental sustainability values I know | <input type="radio"/> | <input type="radio"/> | <input type="radio"/> | <input type="radio"/>           | <input type="radio"/> | <input type="radio"/> | <input type="radio"/> |
| I reduce food waste                                                                    | <input type="radio"/> | <input type="radio"/> | <input type="radio"/> | <input type="radio"/>           | <input type="radio"/> | <input type="radio"/> | <input type="radio"/> |

**For me it is important to find on food packaging**

|                                                                                | Extremely<br>disagree | Disagree              | Somewhat<br>disagree  | Neither<br>agree or<br>disagree | Somewhat<br>agree     | Agree                 | Extremely<br>agree    |
|--------------------------------------------------------------------------------|-----------------------|-----------------------|-----------------------|---------------------------------|-----------------------|-----------------------|-----------------------|
| Indication of<br>packaging<br>materials                                        | <input type="radio"/> | <input type="radio"/> | <input type="radio"/> | <input type="radio"/>           | <input type="radio"/> | <input type="radio"/> | <input type="radio"/> |
| Indication of the<br>type of collection                                        | <input type="radio"/> | <input type="radio"/> | <input type="radio"/> | <input type="radio"/>           | <input type="radio"/> | <input type="radio"/> | <input type="radio"/> |
| Symbols relating to<br>the environmental<br>sustainability of the<br>packaging | <input type="radio"/> | <input type="radio"/> | <input type="radio"/> | <input type="radio"/>           | <input type="radio"/> | <input type="radio"/> | <input type="radio"/> |
| Narrative elements<br>that tell the type of<br>the packaging                   | <input type="radio"/> | <input type="radio"/> | <input type="radio"/> | <input type="radio"/>           | <input type="radio"/> | <input type="radio"/> | <input type="radio"/> |
| Packaging<br>ecological footprint                                              | <input type="radio"/> | <input type="radio"/> | <input type="radio"/> | <input type="radio"/>           | <input type="radio"/> | <input type="radio"/> | <input type="radio"/> |
| Country of origin of<br>the food product                                       | <input type="radio"/> | <input type="radio"/> | <input type="radio"/> | <input type="radio"/>           | <input type="radio"/> | <input type="radio"/> | <input type="radio"/> |
| Nutritional values<br>of the food product                                      | <input type="radio"/> | <input type="radio"/> | <input type="radio"/> | <input type="radio"/>           | <input type="radio"/> | <input type="radio"/> | <input type="radio"/> |
| Expiration date of<br>the food product                                         | <input type="radio"/> | <input type="radio"/> | <input type="radio"/> | <input type="radio"/>           | <input type="radio"/> | <input type="radio"/> | <input type="radio"/> |

**I think that companies could increase the communication of the food packaging sustainability improving the label by means of**

|                                                             | Extremely disagree    | Disagree              | Somewhat disagree     | Neither agree or disagree | Somewhat agree        | Agree                 | Extremely agree       |
|-------------------------------------------------------------|-----------------------|-----------------------|-----------------------|---------------------------|-----------------------|-----------------------|-----------------------|
| Clearer and larger symbols                                  | <input type="radio"/> | <input type="radio"/> | <input type="radio"/> | <input type="radio"/>     | <input type="radio"/> | <input type="radio"/> | <input type="radio"/> |
| Description of symbols                                      | <input type="radio"/> | <input type="radio"/> | <input type="radio"/> | <input type="radio"/>     | <input type="radio"/> | <input type="radio"/> | <input type="radio"/> |
| Environmental impact phrases                                | <input type="radio"/> | <input type="radio"/> | <input type="radio"/> | <input type="radio"/>     | <input type="radio"/> | <input type="radio"/> | <input type="radio"/> |
| More details about the materials that make up the packaging | <input type="radio"/> | <input type="radio"/> | <input type="radio"/> | <input type="radio"/>     | <input type="radio"/> | <input type="radio"/> | <input type="radio"/> |
| More details on how to recycle                              | <input type="radio"/> | <input type="radio"/> | <input type="radio"/> | <input type="radio"/>     | <input type="radio"/> | <input type="radio"/> | <input type="radio"/> |
| QR Code or digital tools                                    | <input type="radio"/> | <input type="radio"/> | <input type="radio"/> | <input type="radio"/>     | <input type="radio"/> | <input type="radio"/> | <input type="radio"/> |

**Thank you for filling out the survey.**

**Your response has been recorded.**
